# How the COVID-19 pandemic is favoring the adoption of digital technologies in healthcare: a literature review

**Authors:** Davide Golinelli, Erik Boetto, Gherardo Carullo, Andrea Giovanni Nuzzolese, Maria Paola Landini, Maria Pia Fantini

## Authors affiliations:

*Davide Golinelli, MD, MPH, MSc*  
DIBINEM, University of Bologna. Via San Giacomo 12, 00126 Bologna, Italy  
E-mail: [davide.golinelli@unibo.it](mailto:davide.golinelli@unibo.it)  
ORCID: 0000-0001-7331-9520

*Erik Boetto, MD*  
DIBINEM, University of Bologna. Via San Giacomo 12, 00126 Bologna, Italy  
E-mail: [erik.boetto@gmail.com](mailto:erik.boetto@gmail.com)  
ORCID: 0000-0002-2509-159X

*Gherardo Carullo, PhD, LMM*  
Department of Italian and Supranational Public Law, University of Milan, Italy  
Email: [gherardo.carullo@unimi.it](mailto:gherardo.carullo@unimi.it)  
ORCID: 0000-0001-9810-0736

*Andrea Giovanni Nuzzolese*  
STLab, ISTC-CNR. Via San Martino della Battaglia 44, 00185 Rome, Italy  
E-mail: [andrea.nuzzolese@cnr.it](mailto:andrea.nuzzolese@cnr.it)  
ORCID: 0000-0003-2928-9496

*Maria Paola Landini, MD*  
IRCCS, Istituto Ortopedico Rizzoli, Bologna, Italy  
Email: [mariapaola.landini@ior.it](mailto:mariapaola.landini@ior.it)  
ORCID: 0000-0002-2842-9824

*Maria Pia Fantini, MD*  
DIBINEM, University of Bologna. Via San Giacomo 12, 00126 Bologna, Italy  
E-mail: [mariapia.fantini@unibo.it](mailto:mariapia.fantini@unibo.it)  
ORCID: 0000-0002-3257-6552.

## Corresponding author:

*Erik Boetto, MD*  
DIBINEM, University of Bologna. Via San Giacomo 12, 00126 Bologna, Italy  
E-mail: [erik.boetto@gmail.com](mailto:erik.boetto@gmail.com) Telephone: +39 3409120675  
ORCID: 0000-0002-2509-159X

**Keywords:** COVID-19; SARS-CoV-2; pandemic; digital; review.

**Word count** (excluding title page, abstract, references and tables): 3979

## **Abstract.**

**Background.** Healthcare is responding to the COVID-19 pandemic through the fast adoption of digital solutions and advanced technology tools. The aim of this study is to describe which digital solutions have been reported in the scientific literature and to investigate their potential impact in the fight against the COVID-19 pandemic.

**Methods.** We conducted a literature review searching PubMed and MedrXiv with terms considered adequate to find relevant literature on the use of digital technologies in response to COVID-19. We developed an impact score to evaluate the potential impact on COVID-19 pandemic of all the digital solutions addressed in the selected papers.

**Results.** The search identified 269 articles, of which 145 full-text articles were assessed and 124 included in the review after screening and impact evaluation. Of selected articles, most of them addressed the use of digital technologies for diagnosis, surveillance and prevention. We report that digital solutions and innovative technologies have mainly been proposed for the diagnosis of COVID-19. In particular, within the reviewed articles we identified numerous suggestions on the use of artificial-intelligence-powered tools for the diagnosis and screening of COVID-19. Digital technologies are useful also for prevention and surveillance measures, for example through contact-tracing apps or monitoring of internet searches and social media usage.

**Discussion.** It is worth taking advantage of the push given by the crisis, and mandatory to keep track of the digital solutions proposed today to implement tomorrow's best practices and models of care, and to be ready for any new moments of emergency.

## 1. BACKGROUND

The Coronavirus Disease 2019 (COVID-19) pandemic, like all “serious disruptions” in human history, is causing an unprecedented health and economic crisis. At the same time though, this new situation is favoring the digital transition in many industries and in the society as a whole. This is the case, for example, of education.[1] The entire sector, from primary schools to Universities, has developed new strategies for teaching remotely, shifting from lectures in classrooms to live conferencing or online courses.[2]

Similarly, now - and perhaps more prominently in the forthcoming months - healthcare is responding to the COVID-19 pandemic through the fast adoption of digital solutions and advanced technology tools. In times of pandemic, digital technology can mitigate or even solve many challenges, thus improving health care delivery. This is currently being done to address acute needs that are a direct or indirect consequence of the pandemic (e.g. apps for patient tracing, remote triage emergency services, etc.). Nevertheless, many of the solutions that have been developed and implemented at the moment of the current emergency could consolidate in the near future, contributing to the definition and adoption of new digital-based models of care.

Although with a certain degree of digital divide,[3] the list of new digital solutions is rapidly growing. Beyond video-visits, these options include email and mobile-phone applications and can expand to include uses of wearable devices, chatbots, artificial-intelligence (AI) powered diagnostic tools, voice-interface systems, or mobile sensors such as smartwatches, oxygen monitors or thermometers. A new category of service is the oversight of persons in home quarantine and large-scale population surveillance. Telemedicine and remote consultation have already proven to be effective at a time when access to health services for non-COVID-19 or non-acute patients is prevented, impeded or postponed. In fact, according to Keesara et al., [4] rather than a model structured on the historically necessary model of in-person interactions between patients and their clinicians' through a face-to-face model of care, today's healthcare services and patient assistance can be guaranteed remotely through digital technologies.

Before the COVID-19 pandemic, it was expected that digital transformation in health care would have been as disruptive as that seen in other industries. However, as stated by Hermann et al.,[5] “*despite new technologies being constantly introduced, this change had yet to materialize*”. [6] It appears that now the spread of COVID-19 has finally provided an ineludible sound reason to fully embrace the digital transformation. Moreover, simulations show that many countries will probably face several waves of contagions and new lockdowns will probably occur.[7] Therefore it becomes necessary to review the digital technologies that have been used during the emergency period and possibly consider them for continued use over time or cyclically in the event of recurring outbreaks.

## 2. AIM OF THE STUDY

According to Hermann et al. [5] digital technologies can be categorized based on the healthcare needs they address: diagnosis, prevention, treatment, adherence, lifestyle, and patient engagement. We argue that it is necessary to understand which digital technologies have been adopted to face the COVID-19 crisis, and whether and how they can still be of any use after the emergency phase. In order to do this it is crucial to cover as many as possible aspects of digital technology use in healthcare in response to the COVID pandemic.

The aim of this study is therefore to describe which digital solutions have been reported in the early scientific literature and to investigate their potential impact in the fight against the COVID-19 pandemic.

### 3. METHODS

#### 3.1.Literature search

We conducted a review of the scientific literature to include quantitative and qualitative studies using diverse designs to describe which digital solutions have been reported to respond and fight the COVID-19 pandemic. The initial search was implemented on May 4, 2020 and was limited to the time-span from January 1, 2020 to April 30, 2020. The search query consisted of terms considered by the authors to review the literature on the use of digital technologies in response to COVID-19. Therefore, we searched PubMed/MEDLINE using the following search terms and database-appropriate syntax:

*("COVID-19"[All Fields] OR "COVID-2019"[All Fields] OR "severe acute respiratory syndrome coronavirus 2"[Supplementary Concept] OR "severe acute respiratory syndrome coronavirus 2"[All Fields] OR "2019-nCoV"[All Fields] OR "SARS-CoV-2"[All Fields] OR "2019nCoV"[All Fields] OR (("Wuhan"[All Fields] AND ("coronavirus"[MeSH Terms] OR "coronavirus"[All Fields])) AND (2019/12[PDAT] OR 2020[PDAT]))) AND (digital[Title/Abstract] OR technology[Title/Abstract])*

We also searched MedRxiv/BiorXiv<sup>1</sup> (a preprint server for health science paper) section COVID-19/SARS-CoV-2 for digital technologies-related studies with the following search string: *COVID-19 digital technology*, with the same time-span restriction applied to the PubMed search.

We placed a language restriction for English, without other limits. A two-stage screening process was used to assess the relevance of identified studies. For the first level of screening, only the title and abstract were reviewed to preclude waste of resources in procuring articles that did not meet the minimum inclusion criteria. For the second level of screening all citations deemed relevant after title and abstract screening were procured for subsequent review of the full-text article.

#### 3.2.Impact assessment

A form was developed to extract article characteristics. We categorized the papers retrieved according to the healthcare needs addressed (diagnosis, prevention, treatment, adherence, lifestyle, patient engagement and other). The definition of each healthcare need is reported in Table 1. We added “surveillance” as an additional healthcare need,[5] given the importance of early identification and confinement of COVID-19 patients, and a category “other” to include any further category not considered.

To evaluate the potential impact on COVID-19 pandemic of all the digital solutions addressed in the selected papers, we developed an impact score, which defines the impact on various healthcare targets, the degree of innovation and the scalability to other geographical areas. The score is calculated summing the following items’ score related to the characteristics of the digital solution proposed by each article:

- Healthcare system targets: score ranging from 1 to 4 depending on how many areas of the digital health services are addressed by a particular digital solution. We chose four target areas according to the Expert Panel on Effective Ways of Investigating in Health (EXPH) of the European Commission classification of digital health services [8]: (i) interventions for clients; (ii) for healthcare providers; (iii) for health system; (iv) for data services.
- Grade of innovation: from 1 to 4 depending on the degree of innovation (Supporting=1; Complementing=2; Substituting=3; Innovating=4). We have categorized the digital health solutions proposed in each paper according to the EXPH classification on the final use of digital tools [8].

---

<sup>1</sup> <https://www.medrxiv.org/>

- Scalability to other geographical areas: from 0 to 2 depending on the possibility to “transfer” the proposed digital solution into other regions or countries (Not possible=0; Possible, but only for limited regions/countries=1; Possible, globally=2).

The total score defines the overall potential impact of a particular digital solution on the COVID-19 pandemic, ranging from a minimum of 2 to a maximum of 10 (a solution that addresses all four areas of the digital health services, with a high degree of innovation and that is possible to implement globally). All articles with a score  $\geq 5$  have been deemed relevant in terms of degree of innovation, potential to impact on the COVID-19 pandemic outcome, and scalability to other geographical areas, and therefore included in the study (Figure 1). We then built a scoring rubric by cross-classifying the use of technology with the type of technology.

Lastly, in order to determine the attention received by the scientific community and the general public for each paper included in the study we traced altmetrics measures. Altmetrics, meant as a subset of scientometrics,[9] is the study and use of scholarly impact measures based on activity in online tools and environments. In order to consider the research impact of each article, we relied on the Computed Impact Score (CIS), which we have calculated as reported in previous papers.[10, 11] All papers with a CIS score above the 90% quantile threshold have been deemed valuable and listed in the results.

**Table 1. Definition of the healthcare needs addressed by digital technologies.**

| Use of technology         | Definition                                                                                                                                                                  |
|---------------------------|-----------------------------------------------------------------------------------------------------------------------------------------------------------------------------|
| <b>Diagnosis</b>          | The process of determining which disease or condition explains a person's symptoms and signs.                                                                               |
| <b>Surveillance</b>       | The continuous, systematic collection, analysis and interpretation of health-related data needed for the planning, implementation, and evaluation of public health practice |
| <b>Prevention</b>         | Preventing the occurrence of a disease (e.g. by reducing risk factors) or by halting a disease and averting resulting complications after its onset.                        |
| <b>Adherence</b>          | The degree to which a patient correctly follows medical advice.                                                                                                             |
| <b>Treatment</b>          | The use of an agent, procedure, or regimen, such as a drug, surgery, or exercise, in an attempt to cure or mitigate a disease                                               |
| <b>Lifestyle</b>          | Adoption and sustaining behaviors that can improve health and quality of life                                                                                               |
| <b>Patient engagement</b> | To actively involve people in their health and health care                                                                                                                  |

#### 4. RESULTS

The search identified 269 articles (174 from Pubmed, 95 from MedrXiv), of which 145 full-text articles were assessed and 124 included in the review after screening and impact assessment (Figure 1).

Of selected articles, 65 (52.4%) addressed the use of digital technologies for diagnosis (Table 2), 46 (37.1%) for surveillance, 46 (37.1%) for prevention, 38 (30.6%) for treatment 15 (12.1%) for adherence, 12 (9.7%) for lifestyle, 11 (8.9%) for patient engagement and 6 (4.8%) for other purposes.

**Table 2. Categories of healthcare needs addressed by digital technologies in the articles selected. N: absolute number of times healthcare needs are addressed.**

| <b>Healthcare need</b>    | <b>N</b> | <b>%*</b> |
|---------------------------|----------|-----------|
| <b>Diagnosis</b>          | 65       | 52.4      |
| <b>Surveillance</b>       | 46       | 37.1      |
| <b>Prevention</b>         | 46       | 37.1      |
| <b>Treatment</b>          | 38       | 30.6      |
| <b>Adherence</b>          | 15       | 12.1      |
| <b>Lifestyle</b>          | 12       | 9.7       |
| <b>Patient engagement</b> | 11       | 8.9       |
| <b>Other</b>              | 6        | 4.8       |

\*The total is higher than 100% since some articles may include technologies used to address more than one healthcare need.

The impact assessment allowed us to select and include articles about digital technologies deemed impactful on the COVID-19 pandemic in terms of degree of innovation, potential impact on various healthcare system areas and scalability to other geographical areas (Table 3).

**Table 3. Articles included in the literature review. Here reported the main characteristics and impact assessment of each paper analyzed.**

| Reference | Area of health services addressed | Impact on healthcare services | Scalability to other geographical areas | Potential digital innovation Impact score | Reference | Area of health services addressed | Impact on healthcare services | Scalability to other geographical areas | Potential digital innovation Impact score |
|-----------|-----------------------------------|-------------------------------|-----------------------------------------|-------------------------------------------|-----------|-----------------------------------|-------------------------------|-----------------------------------------|-------------------------------------------|
| 12        | C, HP, HS, D                      | Innovating                    | Global                                  | 10                                        | 72        | HP                                | Complementing                 | Global                                  | 5                                         |
| 13        | C, HP, HS, D                      | Innovating                    | Local                                   | 9                                         | 73        | HP                                | Complementing                 | Global                                  | 5                                         |
| 14        | C, HP, HS, D                      | Innovating                    | Local                                   | 9                                         | 74        | C, HP, HS, D                      | Innovating                    | Global                                  | 10                                        |
| 15        | C, HP                             | Supporting                    | Global                                  | 5                                         | 75        | HS, D                             | Innovating                    | Local                                   | 7                                         |
| 16        | C, HS, D                          | Innovating                    | Local                                   | 8                                         | 76        | C, HP                             | Innovating                    | Local                                   | 7                                         |
| 17        | HP                                | Complementing                 | Global                                  | 5                                         | 77        | C, HP                             | Innovating                    | Local                                   | 7                                         |
| 18        | HP                                | Complementing                 | Global                                  | 5                                         | 78        | C, HS, D                          | Innovating                    | Local                                   | 8                                         |
| 19        | C, HP, HS                         | Innovating                    | Global                                  | 9                                         | 79        | C, HP, HS, D                      | Innovating                    | Local                                   | 9                                         |
| 20        | HP                                | Complementing                 | Global                                  | 5                                         | 80        | C, HP                             | Innovating                    | Global                                  | 8                                         |
| 21        | HP                                | Complementing                 | Global                                  | 5                                         | 81        | C, HP, HS, D                      | Innovating                    | Local                                   | 9                                         |
| 22        | HP, HS                            | Supporting                    | Global                                  | 5                                         | 82        | C, HP                             | Innovating                    | Local                                   | 7                                         |
| 23        | HP                                | Complementing                 | Global                                  | 5                                         | 83        | C, HP                             | Innovating                    | Local                                   | 7                                         |
| 24        | C, HS, D                          | Innovating                    | Local                                   | 8                                         | 84        | C, HP                             | Innovating                    | Local                                   | 7                                         |
| 25        | C, HP, HS, D                      | Innovating                    | Global                                  | 10                                        | 85        | C, HO                             | Innovating                    | Global                                  | 8                                         |
| 26        | C, HS, D                          | Innovating                    | Local                                   | 8                                         | 86        | HP, HS, D                         | Supporting                    | Global                                  | 6                                         |
| 27        | HP                                | Complementing                 | Global                                  | 5                                         | 87        | C, HP, HS, D                      | Supporting                    | No [0]                                  | 5                                         |
| 28        | HP                                | Complementing                 | Global                                  | 5                                         | 88        | C, HP, HS, D                      | Innovating                    | Global                                  | 10                                        |
| 29        | C, HP, HS, D                      | Innovating                    | Local                                   | 9                                         | 89        | HP, D                             | Complementing                 | Global                                  | 6                                         |
| 30        | C, HP, HS, D                      | Innovating                    | Global                                  | 10                                        | 90        | HS, D                             | Supporting                    | Global                                  | 5                                         |
| 31        | C, HP                             | Innovating                    | Global                                  | 6                                         | 91        | C, HP,                            | Supporting                    | Global                                  | 5                                         |
| 32        | HP                                | Complementing                 | Global                                  | 5                                         | 92        | C, HP                             | Innovating                    | Global                                  | 8                                         |
| 33        | C, HS, D                          | Innovating                    | Local                                   | 8                                         | 93        | C, HP                             | Innovating                    | Global                                  | 8                                         |
| 34        | C, HP                             | Innovating                    | Local                                   | 7                                         | 94        | C, HP, HS, D                      | Innovating                    | Global                                  | 10                                        |
| 35        | C, HS                             | Innovating                    | Local                                   | 7                                         | 95        | C, HP, HS, D                      | Complementing                 | Global                                  | 8                                         |
| 36        | C, HP, HS, D                      | Innovating                    | Local                                   | 9                                         | 96        | HP, HS, D                         | Complementing                 | Global                                  | 7                                         |
| 37        | C, HS, D                          | Innovating                    | Local                                   | 8                                         | 97        | HP; HS                            | Innovating                    | Global                                  | 8                                         |
| 38        | C, HP                             | Innovating                    | Global                                  | 8                                         | 98        | C, HP, HS, D                      | Innovating                    | Global                                  | 10                                        |
| 4         | C, HP, HS, D                      | Innovating                    | Local                                   | 9                                         | 99        | C, HP, HS, D                      | Innovating                    | Global                                  | 10                                        |
| 39        | C, HS, D                          | Innovating                    | Local                                   | 8                                         | 100       | C, HP, HS, D                      | Innovating                    | Local                                   | 9                                         |
| 40        | C, HP                             | Supporting                    | Global                                  | 5                                         | 101       | C, HP                             | Complementing                 | Global                                  | 6                                         |
| 41        | C, HS, D                          | Innovating                    | Local                                   | 8                                         | 102       | C, HP                             | Complementing                 | Global                                  | 6                                         |
| 42        | HS, D                             | Innovating                    | Global                                  | 8                                         | 103       | D                                 | Innovating                    | Global                                  | 7                                         |
| 43        | C, HS, D                          | Innovating                    | Local                                   | 8                                         | 104       | C, HP, HS, D                      | Supporting                    | Global                                  | 7                                         |
| 44        | C, HS, D                          | Innovating                    | Local                                   | 8                                         | 105       | C, HP, HS, D                      | Supporting                    | Global                                  | 7                                         |
| 45        | HP                                | Complementing                 | Global                                  | 5                                         | 106       | HS, D                             | Innovating                    | Global                                  | 8                                         |
| 46        | C, HP, HS, D                      | Innovating                    | Local                                   | 9                                         | 107       | C, HS                             | Supporting                    | Global                                  | 5                                         |
| 47        | C, HP, HS, D                      | Innovating                    | Local                                   | 9                                         | 108       | C, HP, HS, D                      | Substituting                  | Global                                  | 9                                         |
| 48        | C, HS, D                          | Innovating                    | Local                                   | 8                                         | 109       | C                                 | Substituting                  | Global                                  | 5                                         |
| 49        | HS, D                             | Complementing                 | Local                                   | 5                                         | 110       | C, HP, HS                         | Complementing                 | Global                                  | 7                                         |
| 50        | HS, D                             | Innovating                    | Global                                  | 8                                         | 111       | C, HP, D                          | Innovating                    | Global                                  | 9                                         |
| 51        | C, HS, D                          | Innovating                    | Local                                   | 8                                         | 112       | C, HP, HS                         | Supporting                    | Local                                   | 5                                         |
| 52        | C, HP                             | Complementing                 | Global                                  | 6                                         | 113       | C, HP, HS, D                      | Complementing                 | Global                                  | 8                                         |
| 53        | C, HP, HS, D                      | Innovating                    | Local                                   | 9                                         | 114       | C, HP, HS, D                      | Complementing                 | Global                                  | 8                                         |
| 54        | C, HP                             | Innovating                    | Local                                   | 7                                         | 115       | C, HP, HS                         | Complementing                 | Global                                  | 7                                         |
| 55        | C, HP                             | Innovating                    | Global                                  | 8                                         | 116       | HP, HS                            | Supporting                    | Global                                  | 5                                         |
| 56        | CHP                               | Complementing                 | Global                                  | 5                                         | 117       | HP, HS                            | Complementing                 | Local                                   | 5                                         |
| 57        | C, HP                             | Innovating                    | Global                                  | 8                                         | 118       | C, HP                             | Supporting                    | Global                                  | 5                                         |
| 1         | C, HP, HS, D                      | Innovating                    | Local                                   | 9                                         | 3         | C, HP, HS                         | Complementing                 | Global                                  | 7                                         |
| 58        | C, HP, HS, D                      | Innovating                    | Global                                  | 10                                        | 119       | HS                                | Complementing                 | Global                                  | 8                                         |
| 59        | HS, D                             | Innovating                    | Global                                  | 8                                         | 120       | HP, HS                            | Supporting                    | Global                                  | 5                                         |

|           |              |               |        |    |            |              |               |        |   |
|-----------|--------------|---------------|--------|----|------------|--------------|---------------|--------|---|
| <b>60</b> | C, HP, HS, D | Innovating    | Global | 10 | <b>121</b> | HP, HS       | Supporting    | Global | 5 |
| <b>61</b> | C, HP, HS, D | Innovating    | Local  | 9  | <b>122</b> | HP, HS       | Supporting    | Global | 5 |
| <b>62</b> | C, HP, HS, D | Innovating    | Global | 10 | <b>123</b> | HP, HS, D    | Innovating    | Local  | 8 |
| <b>63</b> | HP           | Innovating    | Local  | 6  | <b>124</b> | C, HP, HS    | Innovating    | Global | 9 |
| <b>64</b> | HP           | Complementing | Global | 5  | <b>125</b> | HP, HS, D    | Complementing | Global | 7 |
| <b>65</b> | HP           | Complementing | Global | 5  | <b>126</b> | HP, HS, D    | Supporting    | Local  | 5 |
| <b>66</b> | C, D         | Innovating    | Local  | 7  | <b>127</b> | C, HP        | Innovating    | Global | 8 |
| <b>67</b> | C, HP, HS, D | Innovating    | Local  | 9  | <b>128</b> | C, HP, HS, D | Supporting    | Local  | 6 |
| <b>68</b> | C, HP, HS, D | Innovating    | Local  | 9  | <b>129</b> | C, HP, HS    | Complementing | Global | 7 |
| <b>69</b> | C, D         | Innovating    | Local  | 7  | <b>130</b> | HP, HS       | Complementing | Local  | 5 |
| <b>70</b> | C, HP, HS, D | Innovating    | Global | 10 | <b>131</b> | HP, HS, D    | Supporting    | Global | 5 |
| <b>71</b> | C, HP        | Innovating    | Global | 8  | <b>132</b> | C, HP        | Complementing | Global | 5 |

In Table 4 we cross-classify the use of technology and the type of technology. As an example, 24 articles describe the use of artificial-intelligence tools for the diagnosis of COVID-19, while 34 the use of telehealth/telemedicine for treatment purposes. All included articles and related analyses are reported in Supplementary material.



**Table 4. Cross-classification of use of technology (i.e. healthcare need) and type of technology. The first column reports the categories of health needs addressed by technology type (first line).**

| Use of technology  | Artificial Intelligence                                                                                    | Big Data Analytics                                           | Blockchain    | Chatbot            | Electronic Health Records (EHR)      | Internet Of Things (IOT)   | Internet Search Engine, Social media  | Mobile application                           | Mobile Tracing                                                     | Robotics, mechanical tools, drones, sensors, wearable devices etc. | Telehealth, telemedicine                                                                                                                           |
|--------------------|------------------------------------------------------------------------------------------------------------|--------------------------------------------------------------|---------------|--------------------|--------------------------------------|----------------------------|---------------------------------------|----------------------------------------------|--------------------------------------------------------------------|--------------------------------------------------------------------|----------------------------------------------------------------------------------------------------------------------------------------------------|
| Diagnosis          | 24<br>[15, 17, 18, 20, 21, 23, 25, 27, 28, 33, 43, 45, 49, 56, 64, 65, 72, 73, 89, 95, 103, 104, 117, 125] | 6<br>[25, 49, 95, 104, 113, 117]                             | 2<br>[25, 33] | 3<br>[46, 53, 124] | 7<br>[1, 55, 86, 108, 113, 125, 126] | 3<br>[87, 98, 104]         | 1<br>[1]                              | 8<br>[80, 82, 83, 86, 87, 91, 95, 105]       | 6<br>[43, 44, 68, 95, 105, 113]                                    | 5<br>[40, 96, 104, 109, 127]                                       | 29<br>[1, 12, 34, 52, 54, 55, 57, 58, 60, 61, 62, 67, 68, 70, 71, 76, 79, 80, 81, 82, 83, 84, 85, 86, 95, 98, 102, 113, 115]                       |
| Surveillance       | 12<br>[25, 33, 43, 59, 88, 90, 95, 99, 104, 111, 117, 121]                                                 | 11<br>[14, 24, 25, 29, 37, 88, 95, 104, 117, 121, 131]       | 2<br>[25, 33] | 0                  | 5<br>[1, 32, 86, 108, 128]           | 5<br>[87, 88, 94, 99, 104] | 8<br>[1, 13, 16, 26, 37, 51, 69, 122] | 8<br>[13, 86, 87, 88, 91, 95, 105, 111]      | 14<br>[26, 30, 39, 41, 43, 44, 47, 68, 78, 95, 100, 105, 112, 114] | 3<br>[96, 99, 104]                                                 | 7<br>[1, 68, 70, 84, 85, 86, 95]                                                                                                                   |
| Prevention         | 11<br>[25, 33, 42, 50, 59, 90, 95, 104, 111, 117, 121]                                                     | 12<br>[14, 25, 29, 37, 50, 95, 104, 113, 117, 119, 121, 131] | 2<br>[25, 33] | 1<br>[46]          | 4<br>[108, 113, 126, 128]            | 3<br>[87, 98, 104]         | 3<br>[13, 37, 122]                    | 9<br>[13, 66, 83, 87, 91, 95, 105, 110, 111] | 6<br>[39, 68, 78, 95, 105, 113]                                    | 3<br>[96, 104, 109]                                                | 18<br>[19, 34, 36, 38, 66, 68, 70, 83, 84, 85, 95, 98, 110, 113, 115, 129, 130, 132]                                                               |
| Treatment          | 2<br>[97, 104]                                                                                             | 2<br>[104, 113]                                              | 0             | 0                  | 5<br>[1, 55, 86, 108, 113]           | 2<br>[98, 104]             | 1<br>[1]                              | 3<br>[80, 83, 86]                            | 2<br>[68, 113]                                                     | 2<br>[22, 104]                                                     | 34<br>[1, 3, 12, 19, 31, 34, 52, 54, 55, 57, 58, 60, 61, 62, 63, 67, 68, 70, 71, 74, 79, 80, 81, 83, 86, 92, 93, 98, 101, 102, 113, 118, 129, 130] |
| Adherence          | 1<br>[104]                                                                                                 | 2<br>[104, 113]                                              | 0             | 0                  | 1<br>[113]                           | 1<br>[104]                 | 0                                     | 3<br>[83, 107, 110]                          | 1<br>[113]                                                         | 3<br>[40, 104, 109]                                                | 11<br>[19, 77, 83, 92, 93, 110, 113, 115, 129, 130, 132]                                                                                           |
| Lifestyle          | 1<br>[104]                                                                                                 | 3<br>[35, 104, 113]                                          | 0             | 0                  | 1<br>[113]                           | 1<br>[104]                 | 1<br>[48]                             | 2<br>[66, 107]                               | 1<br>[113]                                                         | 1<br>[104]                                                         | 8<br>[19, 60, 61, 66, 71, 74, 113, 132]                                                                                                            |
| Patient engagement | 1<br>[111]                                                                                                 | 0                                                            | 0             | 0                  | 0                                    | 0                          | 0                                     | 3<br>[107, 110, 111]                         | 0                                                                  | 1<br>[109]                                                         | 8<br>[54, 71, 77, 92, 110, 115, 118, 129]                                                                                                          |
| Other              | 4<br>[75, 99, 103, 120]                                                                                    | 2<br>[106, 123]                                              | 0             | 0                  | 0                                    | 1<br>[99]                  | 1<br>[116]                            | 0                                            | 0                                                                  | 1<br>[99]                                                          | 0                                                                                                                                                  |

Considering the CIS score, only 7 articles [14, 17, 30, 31, 42, 43, 103] (Figure 2 and 3 [Supp] Supplementary material) resulted above the threshold. These papers can be deemed as valuable considering their scientific impact to date.

Below we provide a summary of the existing digital solutions for the fight against COVID-19 reported in the scientific literature available to date. In order to do this, we discuss some of the retrieved articles deemed most interesting for each healthcare needs.

#### **4.1 Diagnosis**

To date, digital solutions and innovative technologies have mainly been proposed for the diagnosis of COVID-19. In particular, within the reviewed articles we identified numerous suggestions on the use of AI-powered tools for the diagnosis and screening of Severe Acute Respiratory Syndrome CoronaVirus 2 (SARS-CoV-2) or COVID-19. Most studies propose the adoption of AI tools based on the use of CTs' data. For example, Zhou et al. [28] developed and validated an integrated deep-learning framework on chest CT images for auto-detection of novel coronavirus pneumonia (NCP), particularly focusing on differentiating NCP from influenza pneumonia (IP), ensuring prompt implementation of isolation. A diagnostic tool like this can be useful during the pandemic, especially when tests such as nucleic acid test kits are short of supply. Nonetheless, performing CT scans as a screening method presents significant limitations, both considering the risk of radiation exposure and operator or machine-type dependence.[20]

Aside from these studies, many Authors propose COVID-19 AI-powered diagnostic tools not based on CT scans data. Feng et al. [17] developed and validated a diagnosis aid model without CT images for early identification of suspected COVID-19 pneumonia on admission in adult fever patients and made the validated model available via an online triage calculator that needs clinical and serological data (e.g. age, %monocytes, IL-6, etc.). Similarly, Martin et al. [46] proposed a chatbot and a symptom-to-disease digital health assistant that can differentiate more than 20,000 diseases with an accuracy of more than 90%.

A further innovative digital technology proposed to support the diagnosis of COVID-19 is the blockchain (or distributed ledger) technology. In one study [33] the Authors recommend a low cost blockchain and AI-coupled self-testing and tracking systems for COVID-19 and other emerging infectious diseases in low middle income countries (LMIC). They developed a low cost blockchain application (app) that requests a user's personal identifier before opening pre-testing instructions. Following testing, the user uploads results into the app and the blockchain and AI system enable the transfer to alert the outbreak surveillance.

Another interesting digital tool proposed for the diagnosis and triage of patients is chatbots. Chatbots are applications that provide information through conversation-like interactions with users and can be used for a broad range of purposes in health care (patient triage, clinical decision support for providers, directing patients and staff to appropriate resources, and mental health applications). Espinoza et al. underline how chatbots can help evolve triage and screening processes in a scalable manner,[124] concluding that, with institutions becoming more and more familiar with these tools, chatbots can be repurposed in the future for other public health emergencies, as well as for more standard care uses.

#### **4.2 Prevention and surveillance**

Our literature review suggests that digital technologies can be useful for COVID-19 diagnosis as well as for implementing prevention and surveillance measures.

In Judson et al.,[53] Authors deploy a Coronavirus Symptom Checker, a digital patient-facing self-triage and self-scheduling tool to address the COVID-19 pandemic, that provides patients with 24-hour access to

personalized recommendations, and improve ambulatory surge capacity through self-triage, self-scheduling and avoidance of unnecessary in-person care. The majority of patients involved did not make any further contact with the health-system during the subsequent days.

Another topic of paramount importance in the context of healthcare digitalization is epidemiological surveillance. Our review highlights that prevention and surveillance are often considered together in the scientific literature, given that "prevention of COVID-19" can be intended as "prevention of further spread", which is mainly done through surveillance.

A study by Ferretti et al. [30] analyzes the key parameters of the COVID-19 epidemic spread to estimate the contribution of different transmission routes and determine requirements for successful case isolation and contact-tracing. The authors concluded that viral spread is too fast to be contained by manual contact tracing. The solution is the implementation of a contact-tracing app which creates a temporary record of proximity events between individuals, and immediately alerts recent close contacts of diagnosed cases and prompts them to self-isolate. An example of successful use of a mobile application for contact tracing is the one that the Chinese Government has implemented in Wuhan, as described by Hua et al. [26] A QR code-screening of people was implemented in the Hubei province to monitor people's movement, especially on public transportation.

Our literature review suggests that another meaningful way to control the spread of an epidemic is through monitoring/surveillance of internet searches and social media usage. Wang et al. [13] used WeChat, a Chinese social media, to plot daily data on the frequencies of keywords related to SARS-CoV-2. The authors found that the frequencies of several keywords related to COVID-19 behaved abnormally during a period ahead of the outbreak in China and stated that social media can offer a new approach to early detect disease outbreaks. Similarly, the Italian words for "cough" and "fever" have been searched in Google Trends to find useful insights to predict the COVID-19 outbreak in Italy, showing a significant association with hospital admissions or deaths in the two following weeks.[133]

Although its potential is irrefutable, the technology behind surveillance and contact tracing apps raises many concerns, as discussed by Calvo et al., [41] the most obvious one being "surveillance creep", that is when a surveillance tool developed for a precise goal sticks around even when the crisis is solved. Privacy must be a primary concern for the policy makers and a key challenge for designers and engineers that design the digital tools for epidemic control. As already outlined in a previous work by Carullo,[134] in the EU applications to combat COVID-19 should not process personal data whenever possible. The General Data Protection Regulation (GDPR) dictates the principle of privacy by default, that is "by default, only personal data which are necessary for each specific purpose of the processing are processed". To be compliant with this principle, a preferable approach is therefore to trace the spread of the virus, and therefore alert users, without collecting any personal data. A promising example that goes in this direction is brought by Yasaka et al. [47] with their open source proof-of-concept app for contact tracing that does not require registration or the divulcation of any private data, such as location. Instead, this tool utilizes an ingenious "checkpoint" system, that allows the users to create a peer-to-peer network of interactions and to know if they have been exposed to any risk of infection; diagnosis of infection can be logged into the app, the data is transferred to a central server but stays anonymous.

In regard to the field of prevention, other important digital technologies proposed in the literature include telemedicine and telehealth. Telemedicine does not always cover emergencies, and, as shown also from Lin et al.,[32] many COVID-19 patients may need to go to the hospital for higher level care. For this purpose, Turer et al. [38] propose using electronic Personal Protective Equipment (ePPE) to protect staff (i.e. preventing healthcare workers infections) and conserve PPE while providing rapid access to emergency care for low risk patients during the COVID-19 pandemic. A similar solution has been proposed by Wittbold et al.[82]

### **4.3 Treatment and adherence**

Telemedicine and telehealth technologies are also used to increase patient adherence and for treatment purposes. Torous et al.[19] describe the potential of digital health to increase access and quality of mental health care by exploring the success of telehealth during the present crisis and how technologies like Apps can soon play a larger role. Telehealth is seen as a useful solution to deliver mental health care commonly,[135] and during social distancing and quarantine periods.

As another example, Calton et al. [31] deliver some useful tips on the implementation of telemedicine to deliver specialty-palliative care into the homes of seriously ill patients and their families. The authors state that digital divide must be taken into account. Patients need access to a digital device suited for video conference and to an internet connection. For the elderly or the less prone to technology, it may be necessary to identify a caregiver as a “technological liaison” for the patient. To create a successful treatment telemedicine environment, many critical factors are needed: workforce training, high-quality evidence, digital equity, and patient adherence.

### **4.4 Lifestyle and patient engagement**

Fewer scientific contributions address the use of digital technologies for lifestyle empowerment or patient engagement. This is probably due to the current phase of the pandemic that has conditioned scientific research to focus primarily on aspects related to more “acute” healthcare needs. However, some articles are present. For instance, Krukowski et al. [115] dealt with the issue of remote obesity management through telehealth methodologies such as electronic scales (e-scales) to remotely measure weight and to maintain patient engagement towards healthy lifestyles.

## **5. DISCUSSION**

While SARS-CoV-2 is causing a pandemic worldwide, it is also favoring the rapid adoption of digital solutions and advanced technology tools in healthcare. On the one hand, physicians and health systems may need to track large populations of patients on a daily basis for surveillance purposes.[4] On the other hand, they may need fast diagnostic tests for COVID-19 screening, in order to reduce the workload and enable patients to get early diagnoses and timely treatments. This is also done with the help of digital technologies, which were already available in different industries before the current crisis. These tools have now been quickly implemented in healthcare due to the pandemic.[99]

In this literature review we describe numerous digital solutions and technologies addressing several healthcare needs. The constantly updated scientific literature is a source of important ideas and suggestions for finding innovative solutions that guarantee patient care during and possibly after the COVID-19 crisis.

In the field of diagnosis, digital solutions that integrate with the traditional methods of clinical, molecular or serological diagnosis, such as AI-based diagnostic algorithms based both on imaging and/or clinical data, seem promising and widely used.

As for surveillance, digital apps have already proven their effectiveness, but problems related to privacy and usability remain. For other healthcare needs, several solutions have been proposed using, for example, telemedicine or telehealth tools. These have long been available, but perhaps this historical moment could actually favor their definitive large-scale adoption.

The fact that the digital technologies proposed in the analyzed scientific literature mainly address the fields of diagnosis, prevention and surveillance probably reflects the emergency phase of the COVID-19 pandemic. As

time passes, well known digital tools could be proposed for different purposes and healthcare needs, such as adherence, lifestyle and patient engagement.

In addition to the healthcare needs addressed by digital technologies, our review also sheds the light on the most used digital technology tools. Given the early phase of the pandemic, the technologies that have shown to be more easily and quickly implementable can be also considered as the most scalable ones. Among these we report artificial-intelligence tools for diagnosis, big data analytics and mobile tracing for surveillance and prevention, and telemedicine/telehealth, which has proved to be a transversal tool for diagnosis, prevention and treatment.

We advocate that many digital technologies quickly implemented in this emergency phase can also be adopted in the following phases of the pandemic.

However, all of this is easier said than done. In the context of the “*Health Care’s Digital Revolution*” brought to the USA (and worldwide) by the COVID-19 pandemic,[4] while private corporations and education institutions have made a quick transition to remote work and videoconferencing, the healthcare system is still lagging behind in adopting digital solutions. This is mainly due to the fact that clinical workflows and economic incentives have been developed for a face-to-face model of care which, during this pandemic, contributes to the spread of the virus to uninfected patients who are seeking medical care. Other than healthcare policies “history”, there are additional limiting factors to the implementation of tools like telemedicine, including a legal framework that is not yet fully designed to regulate the use of innovative IT systems in healthcare, as well as an inadequate ICT infrastructure and an obsolete reimbursement and payment structure.

Many countries are facing these regulatory issues: the challenges for digital health have become a global issue into the public health response to COVID-19 and future outbreaks. Digital tools such as telemedicine should indeed be integrated into international and national guidelines for public health preparedness, alongside the definition of national regulations and funding frameworks in the context of public health emergencies. In order to switch to new digital-based models of care, increasing digital-expertise of health care professionals and educating the population are fundamental issues. Moreover, by implementing a data-sharing mechanism, digitally collected and stored data will be a precious tool also for epidemiological surveillance, that, as discussed earlier, is fundamental in controlling the epidemic spread. Lastly, in order to describe and assess the impact of digital tools during outbreaks, scientific evaluation frameworks should be defined.[36]

This literature review presents some limitations. First, the research was conducted in a period of epidemiological emergency. This determines a large number of daily publications, which is difficult to keep up to date. As a result, we have been forced to select articles in a reduced time span, potentially missing other studies and including studies yet to be peer-reviewed. Secondly, due to the design of the review, the search could not be fully comprehensive, as it was conducted exclusively on Pubmed and MedrXiv. Finally, the articles and concepts included in this preliminary review certainly need to be afterwards integrated at the end of this international emergency phase.

In conclusion, the COVID-19 pandemic is favoring the implementation of digital solutions at a speed and with an impact never seen before. It is therefore mandatory to keep track of the ideas and solutions proposed today to implement tomorrow's best practices and models of care, and to be prepared in case of future national and international emergencies. We believe that it is worth taking advantage of the push given by the crisis we are experiencing today to implement at least some of the solutions proposed in the scientific literature, especially in those national health systems which in recent years proved to be particularly resistant to the digital transition.

## ACKNOWLEDGMENTS:

N/A

## COMPETING INTERESTS:

The authors declare that they have no competing interests.

## FUNDING SOURCES:

The authors declare that they have not received any specific funding.

## REFERENCES

1. Robbins T, Hudson S, Ray P, et al. COVID-19: A new digital dawn?. *Digit Health*. 2020;6:2055207620920083. Published 2020 Apr 11. PMID: 32313668. <https://doi.org/10.1177/2055207620920083>
2. Gewin V. Five tips for moving teaching online as COVID-19 takes hold. *Nature*. 2020;580(7802):295–296. PMID: 32210377. <https://doi.org/10.1038/d41586-020-00896-7>
3. Ramsetty A, Adams C. Impact of the digital divide in the age of COVID-19 [published online ahead of print, 2020 Apr 28]. *J Am Med Inform Assoc*. 2020;ocaa078. PMID: 32343813. <https://doi.org/10.1093/jamia/ocaa078>
4. Keesara S, Jonas A, Schulman K. Covid-19 and Health Care's Digital Revolution [published online ahead of print, 2020 Apr 2]. *N Engl J Med*. 2020;10.1056/NEJMp2005835. PMID: 32240581. <https://doi.org/10.1056/NEJMp2005835>
5. Herrmann M, Boehme P, Mondritzki T, et al. Digital Transformation and Disruption of the Health Care Sector: Internet-Based Observational Study. *J Med Internet Res* 2018;20(3):e104. <https://doi.org/10.2196/jmir.9498>
6. Perakslis ED. Strategies for delivering value from digital technology transformation. *Nat Rev Drug Discov*. 2017;16(2):71–72. PMID: 29588274. <https://doi.org/10.1038/nrd.2016.265>
7. Kissler SM, Tedijanto C, Goldstein E, et al. Projecting the transmission dynamics of SARS-CoV-2 through the postpandemic period [published online ahead of print, 2020 Apr 14]. *Science*. 2020;eabb5793. PMID: 32291278. <https://doi.org/10.1126/science.abb5793>
8. Expert Panel on Effective Ways of Investigating in Health (EXPH), European Commission. “Assessing the impact of digital transformation of Health Services. Report of the Expert Panel on effective ways of investing in Health (EXPH)”. ISBN: 978-92-79-98685-7. doi:10.2875/644722. EW-07-18-124-EN-N.
9. Priem J, Groth P, Taraborelli D. The altmetrics collection. *PLoS One*. 2012;7(11):e48753. PMID: 23133655. <https://doi.org/10.1371/journal.pone.0048753>
10. Nuzzolese GA, Golinelli D, Boetto E, et al. Using altmetrics for detecting impactful research in quasi-zero-day time-windows: the case of COVID-19. [arXiv:2004.06179v1](https://arxiv.org/abs/2004.06179v1) [cs.DL]
11. Golinelli D, Nuzzolese GA, Boetto E, et al. The impact of early scientific literature in response to COVID-19: a scientometric perspective. *medRxiv* 2020.04.15.20066183; <https://doi.org/10.1101/2020.04.15.20066183>
12. Zhai Y, Wang Y, Zhang M, et al. From Isolation to Coordination: How Can Telemedicine Help Combat the COVID-19 Outbreak? *medRxiv* 2020.02.20.20025957; <https://doi.org/10.1101/2020.02.20.20025957>
13. Wang W, Wang Y, Zhang X, et al. WeChat, a Chinese social media, may early detect the SARS-CoV-2 outbreak in 2019. *medRxiv* 2020.02.24.20026682; <https://doi.org/10.1101/2020.02.24.20026682>
14. Wang CJ, Ng CY, Brook RH. Response to COVID-19 in Taiwan: Big Data Analytics, New Technology, and Proactive Testing [published online ahead of print, 2020 Mar 3]. *JAMA*. 2020. PMID: 32125371. <https://doi.org/10.1001/jama.2020.3151>
15. Yan L, Zhang HT, Xiao Y, et al. Prediction of criticality in patients with severe Covid-19 infection using three clinical features: a machine learning-based prognostic model with clinical data in Wuhan. *medRxiv* 2020.02.27.20028027; <https://doi.org/10.1101/2020.02.27.20028027>
16. Hou Z, Du F, Jiang H, et al. Assessment of public attention, risk perception, emotional and behavioural responses to the COVID-19 outbreak: social media surveillance in China *medRxiv* 2020.03.14.20035956; <https://doi.org/10.1101/2020.03.14.20035956>
17. Feng C, Huang Z, Wang L, et al. A Novel Triage Tool of Artificial Intelligence Assisted Diagnosis Aid System for Suspected COVID-19 pneumonia In Fever Clinics. *medRxiv* 2020.03.19.20039099; <https://doi.org/10.1101/2020.03.19.20039099>

18. Jin S, Wang B, Xu H, et al. AI-assisted CT imaging analysis for COVID-19 screening: Building and deploying a medical AI system in four weeks. medRxiv 2020.03.19.20039354; <https://doi.org/10.1101/2020.03.19.20039354>
19. Torous J, Jän Myrick K, Rauseo-Ricupero N, Firth J. Digital Mental Health and COVID-19: Using Technology Today to Accelerate the Curve on Access and Quality Tomorrow. JMIR Ment Health. 2020;7(3):e18848. Published 2020 Mar 26. PMID: 32213476. <https://doi.org/10.2196/18848>
20. Wang S, Zha Y, Li W, et al. A Fully Automatic Deep Learning System for COVID-19 Diagnostic and Prognostic Analysis. medRxiv 2020.03.24.20042317; <https://doi.org/10.1101/2020.03.24.20042317>
21. Zheng C, Deng X, Fu Q et al. Deep Learning-based Detection for COVID-19 from Chest CT using Weak Label. medRxiv 2020.03.12.20027185; <https://doi.org/10.1101/2020.03.12.20027185>
22. Galbiati C, Bonivento W, Caravati M, et al. Mechanical Ventilator Milano (MVM): A Novel Mechanical Ventilator Designed for Mass Scale Production in Response to the COVID-19 Pandemics. medRxiv 2020.03.24.20042234; <https://doi.org/10.1101/2020.03.24.20042234>
23. Bai X, Fang C, Zhou Y, et al. Predicting COVID-19 malignant progression with AI techniques. medRxiv 2020.03.20.20037325; <https://doi.org/10.1101/2020.03.20.20037325>
24. Ienca M, Vayena E. On the responsible use of digital data to tackle the COVID-19 pandemic. Nat Med. 2020;26(4):463-464. PMID: 32284619. <https://doi.org/10.1038/s41591-020-0832-5>
25. Ting DSW, Carin L, Dzau V, Wong TY. Digital technology and COVID-19. Nat Med. 2020;26(4):459-461. PMID: 32284618. <https://doi.org/10.1038/s41591-020-0824-5>
26. Hua J, Shaw R. Corona Virus (COVID-19) “Infodemic” and Emerging Issues through a Data Lens: The Case of China. Int J Environ Res Public Health. 2020;17(7):E2309. Published 2020 Mar 30. PMID: 32235433. <https://doi.org/10.3390/ijerph17072309>
27. Fu M, Yi S, Zeng Y, et al. Deep Learning-Based Recognizing COVID-19 and other Common Infectious Diseases of the Lung by Chest CT Scan Images. medRxiv 2020.03.28.20046045; <https://doi.org/10.1101/2020.03.28.20046045>
28. Zhou M, Chen Y, Wang D, et al. Improved deep learning model for differentiating novel coronavirus pneumonia and influenza pneumonia. medRxiv 2020.03.24.20043117; <https://doi.org/10.1101/2020.03.24.20043117>
29. Lin C, Braund WE, Auerbach J, et al. Policy Decisions and Use of Information Technology to Fight 2019 Novel Coronavirus Disease, Taiwan [published online ahead of print, 2020 Mar 31]. Emerg Infect Dis. 2020;26(7):10.3201/eid2607.200574. PMID: 32228808. <https://doi.org/10.3201/eid2607.200574>
30. Ferretti L, Wymant C, Kendall M, et al. Quantifying SARS-CoV-2 transmission suggests epidemic control with digital contact tracing [published online ahead of print, 2020 Mar 31]. Science. 2020;eabb6936. PMID: 32234805. <https://doi.org/10.1126/science.abb6936>
31. Calton B, Abedini N, Fratkin M. Telemedicine in the Time of Coronavirus [published online ahead of print, 2020 Mar 31]. J Pain Symptom Manage. 2020;S0885-3924(20)30170-6. PMID: 32240756. <https://doi.org/10.1016/j.jpainsymman.2020.03.019>
32. Lin CY, Cheng CH, Lu PL, et al. Active Surveillance for Suspected COVID-19 Cases in Inpatients with Information Technology [published online ahead of print, 2020 Mar 31]. J Hosp Infect. 2020;S0195-6701(20)30126-2. PMID: 32243950. <https://doi.org/10.1016/j.jhin.2020.03.027>
33. Mashamba-Thompson TP, Crayton ED. Blockchain and Artificial Intelligence Technology for Novel Coronavirus Disease-19 Self-Testing. Diagnostics (Basel). 2020;10(4):E198. Published 2020 Apr 1. PMID: 32244841. <https://doi.org/10.3390/diagnostics10040198>
34. Salako O, Okunade K, Allsop M, et al. Upheaval in cancer care during the COVID-19 outbreak. Ecancermedscience. 2020;14:ed97. Published 2020 Apr 1. PMID: 32269597. <https://doi.org/10.3332/ecancer.2020.ed97>
35. Hernández-García I, Giménez-Júlvez T. Assessment of Health Information About COVID-19 Prevention on the Internet: Infodemiological Study. JMIR Public Health Surveill. 2020;6(2):e18717. Published 2020 Apr 1. PMID: 32217507. <https://doi.org/10.2196/18717>
36. Ohannessian R, Duong TA, Odone A. Global Telemedicine Implementation and Integration Within Health Systems to Fight the COVID-19 Pandemic: A Call to Action. JMIR Public Health Surveill. 2020;6(2):e18810. Published 2020 Apr 2. PMID: 32238336. <https://doi.org/10.2196/18810>
37. Shanlang L, Chao M, Ruofei L, et al. Research on the Influence of Information Diffusion on the Transmission of the Novel Coronavirus (COVID-19) medRxiv 2020.03.31.20048439; <https://doi.org/10.1101/2020.03.31.20048439>
38. Turer RW, Jones I, Rosenbloom ST, et al. Electronic Personal Protective Equipment: A Strategy to Protect Emergency Department Providers in the Age of COVID-19 [published online ahead of print, 2020 Apr 2]. J Am Med Inform Assoc. 2020;ocaa048. PMID: 32240303. <https://doi.org/10.1093/jamia/ocaa048>

39. Her M. How Is COVID-19 Affecting South Korea? What Is Our Current Strategy? [published online ahead of print, 2020 Apr 3]. *Disaster Med Public Health Prep.* 2020;13(3). PMID: 32241325. <https://doi.org/10.1017/dmp.2020.69>
40. Klum M, Urban M, Tigges T, et al. Wearable Cardiorespiratory Monitoring Employing a Multimodal Digital Patch Stethoscope: Estimation of ECG, PEP, LVET and Respiration Using a 55 mm Single-Lead ECG and Phonocardiogram. *Sensors (Basel)*. 2020;20(7):E2033. Published 2020 Apr 4. PMID: 32260436. <https://doi.org/10.3390/s20072033>
41. Calvo R, Deterding C, Ryan R. (2020). Health surveillance during covid-19 pandemic : How to safeguard autonomy and why it matters. *BMJ.* 2020; 369. <https://doi.org/10.1136/bmj.m1373>
42. Dandekar R, Barbastathis G. Quantifying the effect of quarantine control in Covid-19 infectious spread using machine learning. medRxiv 2020.04.03.20052084; <https://doi.org/10.1101/2020.04.03.20052084>
43. Drew DA, Nguyen LH, Steves CJ, et al. Rapid implementation of mobile technology for real-time epidemiology of COVID-19. medRxiv 2020.04.02.20051334; <https://doi.org/10.1101/2020.04.02.20051334>
44. Segal E, Zhang F, Lin X, et al. Building an International Consortium for Tracking Coronavirus Health Status medRxiv 2020.04.02.20051284; <https://doi.org/10.1101/2020.04.02.20051284>
45. Hassanien AE Sr., Mahdy LN Jr., Ezzat KA Jr., Elmousalami HH Jr., Ella HA Jr. Automatic X-ray COVID-19 Lung Image Classification System based on Multi-Level Thresholding and Support Vector Machine medRxiv 2020.03.30.20047787; <https://doi.org/10.1101/2020.03.30.20047787>
46. Martin A, Nateqi J, Gruarin S, et al. An artificial intelligence based first-line defence against COVID-19: digitally screening citizens for risks via a chatbot. bioRxiv 2020.03.25.008805; <https://doi.org/10.1101/2020.03.25.008805>
47. Yasaka TM, Lechrich BM, Sahyouni R. Peer-to-Peer Contact Tracing: Development of a Privacy-Preserving Smartphone App. *JMIR Mhealth Uhealth.* 2020;8(4):e18936. Published 2020 Apr 7. PMID: 32240973. <https://doi.org/10.2196/18936>
48. Medford RJ, Saleh SN, Sumarsono A, et al. An "Infodemic": Leveraging High-Volume Twitter Data to Understand Public Sentiment for the COVID-19 Outbreak. medRxiv 2020.04.03.20052936; <https://doi.org/10.1101/2020.04.03.20052936>
49. Salg GA, Ganten MK, Baumhauer M, Heussel CP, Kleesiek J. A globally available COVID-19 - Template for clinical imaging studies. medRxiv 2020.04.02.20048793; <https://doi.org/10.1101/2020.04.02.20048793>
50. Abhari R, Marini M, Chokani N. COVID-19 Epidemic in Switzerland: Growth Prediction and Containment Strategy Using Artificial Intelligence and Big Data. medRxiv 2020.03.30.20047472; <https://doi.org/10.1101/2020.03.30.20047472>
51. Jarynowski A, Wojta-Kempa M, Belik V. Perception of emergent epidemic of COVID-2019 / SARS CoV-2 on the Polish Internet. medRxiv 2020.03.29.20046789; <https://doi.org/10.1101/2020.03.29.20046789>
52. Stommel WJP, van Goor H, Stommel MWJ. The Impact of Video-Mediated Communication on Closed Wound Assessments in Postoperative Consultations: Conversation Analytical Study. *J Med Internet Res.* 2020;22(5):e17791. Published 2020 May 5. PMID: 32310816. <https://doi.org/10.2196/17791>
53. Judson TJ, Odisho AY, Neinstein AB, et al. Rapid Design and Implementation of an Integrated Patient Self-Triage and Self-Scheduling Tool for COVID-19 [published online ahead of print, 2020 Apr 8]. *J Am Med Inform Assoc.* 2020;ocaa051. PMID: 32267928. <https://doi.org/10.1093/jamia/ocaa051>
54. Čosić K, Popović S, Šarlija M, Kesedžić I. Impact of Human Disasters and COVID-19 Pandemic on Mental Health: Potential of Digital Psychiatry. *Psychiatr Danub.* 2020;32(1):25-31. PMID: 32303026. <https://doi.org/10.24869/psyd.2020.25>
55. Grange ES, Neil EJ, Stoffel M, et al. Responding to COVID-19: The UW Medicine Information Technology Services Experience. *Appl Clin Inform.* 2020;11(2):265-275. PMID: 32268390. <https://doi.org/10.1055/s-0040-1709715>
56. Castiglioni I, Ippolito D, Interlenghi M, et al. Artificial intelligence applied on chest X-ray can aid in the diagnosis of COVID-19 infection: a first experience from Lombardy, Italy. medRxiv 2020.04.08.20040907; <https://doi.org/10.1101/2020.04.08.20040907>
57. Serper M, Cubell AW, Deleener ME, et al. Telemedicine in Liver Disease and Beyond: Can the COVID-19 Crisis Lead to Action? [published online ahead of print, 2020 Apr 10]. *Hepatology.* 2020;10.1002/hep.31276. PMID: 32275784. <https://doi.org/10.1002/hep.31276>
58. Crump WJ. Telemedicine: Has the Time Really Finally Arrived? [published online ahead of print, 2020 Apr 11]. *J Rural Health.* 2020;10.1111/jrh.12435. PMID: 32277729. <https://doi.org/10.1111/jrh.12435>
59. Punn NS, Sonbhadra SK, Agarwal S. COVID-19 Epidemic Analysis using Machine Learning and Deep Learning Algorithms. medRxiv 2020.04.08.20057679; <https://doi.org/10.1101/2020.04.08.20057679>
60. Myers US, Birks A, Grubaugh AL, Axon RN. Flattening the Curve by Getting Ahead of It: How the VA Healthcare System Is Leveraging Telehealth to Provide Continued Access to Care for Rural Veterans [published online ahead of print, 2020 Apr 13]. *J Rural Health.* 2020;10.1111/jrh.12449. PMID: 32282955. <https://doi.org/10.1111/jrh.12449>



61. Noonan D, Simmons LA. Navigating Nonessential Research Trials During COVID19: The Push We Needed For Using Digital Technology To Increase Access For Rural Participants? [published online ahead of print, 2020 Apr 13]. *J Rural Health*. 2020;10.1111/jrh.12446. PMID: 32282959. <https://doi.org/10.1111/jrh.12446>
62. Loeb AE, Rao SS, Ficke JR, Morris CD, Riley LH 3rd, Levin AS. Departmental Experience and Lessons Learned With Accelerated Introduction of Telemedicine During the COVID-19 Crisis [published online ahead of print, 2020 Apr 14]. *J Am Acad Orthop Surg*. 2020;10.5435/JAAOS-D-20-00380. PMID: 32301818. <https://doi.org/10.5435/JAAOS-D-20-00380>
63. Price AT, Henke LE, Maraghechi B, et al. Implementation of a Novel Remote Physician SBRT Coverage Process during the Coronavirus Pandemic. medRxiv 2020.04.09.20059857; <https://doi.org/10.1101/2020.04.09.20059857>
64. Vaishya R, Javaid M, Khan IH, Haleem A. Artificial Intelligence (AI) applications for COVID-19 pandemic [published online ahead of print, 2020 Apr 14]. *Diabetes Metab Syndr*. 2020;14(4):337-339. PMID: 32305024. <https://doi.org/10.1016/j.dsx.2020.04.012>
65. Stubblefield J, Hervert M, Causey J, et al. Cardiac or Infectious? Transfer Learning with Chest X-Rays for ER Patient Classification. medRxiv 2020.04.11.20062091; <https://doi.org/10.1101/2020.04.11.20062091>
66. Yuan EJ, Hsu CA, Lee WC, Chen TJ, Chou LF, Hwang SJ. Where to buy face masks? Survey of applications using Taiwan's open data in the time of COVID-19 [published online ahead of print, 2020 Apr 15]. *J Chin Med Assoc*. 2020;10.1097/JCMA.0000000000000325. PMID: 32304508. <https://doi.org/10.1097/JCMA.0000000000000325>
67. Pollock K, Setzen M, Svider PF. Embracing telemedicine into your otolaryngology practice amid the COVID-19 crisis: An invited commentary [published online ahead of print, 2020 Apr 15]. *Am J Otolaryngol*. 2020;102490. PMID: 32307192. <https://doi.org/10.1016/j.amjoto.2020.102490>
68. Mahmood S, Hasan K, Colder Carras M, Labrique A. Global Preparedness Against COVID-19: We Must Leverage the Power of Digital Health. *JMIR Public Health Surveill*. 2020;6(2):e18980. Published 2020 Apr 16. PMID: 32297868. <https://doi.org/10.2196/18980>
69. Gallotti R, Valle F, Castaldo N, et al. Assessing the risks of "infodemics" in response to COVID-19 epidemics. medRxiv 2020.04.08.20057968; <https://doi.org/10.1101/2020.04.08.20057968>
70. Ren X, Zhai Y, Song X, Wang Z, Dou D, Li Y. The Application of Mobile Telehealth System to Facilitate Patient Information Presentation and Case Discussion [published online ahead of print, 2020 Apr 16]. *Telemed J E Health*. 2020;10.1089/tmj.2020.0084. PMID: 32298208. <https://doi.org/10.1089/tmj.2020.0084>
71. Goldschmidt K. The COVID-19 pandemic: Technology use to support the wellbeing of children [published online ahead of print, 2020 Apr 16]. *J Pediatr Nurs*. 2020;S0882-5963(20)30269-4. PMID: 32317129. <https://doi.org/10.1016/j.pedn.2020.04.013>
72. Al-karawi D, Al-Zaidi S, Polus N, Jassim S. Machine Learning Analysis of Chest CT Scan Images as a Complementary Digital Test of Coronavirus (COVID-19) Patients. medRxiv 2020.04.13.20063479; <https://doi.org/10.1101/2020.04.13.20063479>
73. Kumar R, Arora A, Bansal B, et al. Accurate Prediction of COVID-19 using Chest X-Ray Images through Deep Feature Learning model with SMOTE and Machine Learning Classifiers. medRxiv 2020.04.13.20063461; <https://doi.org/10.1101/2020.04.13.20063461>
74. Garg SK, Rodbard D, Hirsch IB, Forlenza GP. Managing New-Onset Type 1 Diabetes During the COVID-19 Pandemic: Challenges and Opportunities [published online ahead of print, 2020 Apr 17]. *Diabetes Technol Ther*. 2020;10.1089/dia.2020.0161. PMID: 32302499. <https://doi.org/10.1089/dia.2020.0161>
75. Kuziemski M, Misuraca G. AI governance in the public sector: Three tales from the frontiers of automated decision-making in democratic settings [published online ahead of print, 2020 Apr 17]. *Telecomm Policy*. 2020;101976. PMID: 32313360. PMID: 32304574. <https://doi.org/10.1016/j.telpol.2020.101976>
76. Jakhar D, Kaur I, Kaul S. Screen mirroring, screen casting and screen sharing during COVID-19: What a dermatologist should know [published online ahead of print, 2020 Apr 18]. *Clin Exp Dermatol*. 2020;10.1111/ced.14247. PMID: 32304574. <https://doi.org/10.1111/ced.14247>
77. Marasca C, Ruggiero A, Fontanella G, et al. Telemedicine and support groups in order to improve the adherence to treatment and health related quality of life in patients affected by inflammatory skin conditions during COVID-19 emergency [published online ahead of print, 2020 Apr 18]. *Clin Exp Dermatol*. 2020;10.1111/ced.14245. PMID: 32304587. <https://doi.org/10.1111/ced.14245>
78. Bulchandani VB, Shivam S, Moudgalya S, Sondhi SL. Digital Herd Immunity and COVID-19. medRxiv 2020.04.15.20066720; <https://doi.org/10.1101/2020.04.15.20066720>
79. Green AS, Ruchman SG, Katz CL, Singer EK. Piloting Forensic Tele-Mental Health Evaluations of Asylum Seekers. medRxiv 2020.04.15.20063677; <https://doi.org/10.1101/2020.04.15.20063677>

80. Nagra M, Vianya-Estopa M, Wolffsohn JS. Could telehealth help eye care practitioners adapt contact lens services during the COVID-19 pandemic? [published online ahead of print, 2020 Apr 18]. *Cont Lens Anterior Eye*. 2020;S1367-0484(20)30075-8. PMID: 32336578. <https://doi.org/10.1016/j.clae.2020.04.002>
81. O'Connor CM, Anoushiravani AA, DiCaprio MR, Healy WL, Iorio R. Economic Recovery After the COVID-19 Pandemic: Resuming Elective Orthopedic Surgery and Total Joint Arthroplasty [published online ahead of print, 2020 Apr 18]. *J Arthroplasty*. 2020;S0883-5403(20)30425-3. PMID: 32345566. <https://doi.org/10.1016/j.arth.2020.04.038>
82. Wittbold KA, Baugh JJ, Yun BJ, et al. iPad deployment for virtual evaluation in the emergency department during the COVID-19 pandemic [published online ahead of print, 2020 Apr 18]. *Am J Emerg Med*. 2020;S0735-6757(20)30253-9. PMID: 32317204. <https://doi.org/10.1016/j.ajem.2020.04.025>
83. Hightow-Weidman L, Muessig K, et al. Maximizing Digital Interventions for Youth in the Midst of Covid-19: Lessons from the Adolescent Trials Network for HIV Interventions [published online ahead of print, 2020 Apr 18]. *AIDS Behav*. 2020;1□5. PMID: 32306214. <https://doi.org/10.1007/s10461-020-02870-w>
84. Bonavita S, Tedeschi G, Atreja A, Lavorgna L. Digital triage for people with multiple sclerosis in the age of COVID-19 pandemic. *Neurol Sci*. 2020;41(5):1007□1009. PMID: 32303856. <https://doi.org/10.1007/s10072-020-04391-9>
85. Wosik J, Fudim M, Cameron B, et al. Telehealth Transformation: COVID-19 and the rise of Virtual Care [published online ahead of print, 2020 Apr 20]. *J Am Med Inform Assoc*. 2020;ocaa067. PMID: 32311034. <https://doi.org/10.1093/jamia/ocaa067>
86. Yan A, Zou Y, Mirchandani DA. How hospitals in mainland China responded to the outbreak of COVID-19 using IT-enabled services: an analysis of hospital news webpages [published online ahead of print, 2020 Apr 20]. *J Am Med Inform Assoc*. 2020;ocaa064. PMID: 32311036. <https://doi.org/10.1093/jamia/ocaa064>
87. Lin B, Wu S. COVID-19 (Coronavirus Disease 2019): Opportunities and Challenges for Digital Health and the Internet of Medical Things in China. *OMICS*. 2020;24(5):231□232. PMID: 32311300. <https://doi.org/10.1089/omi.2020.0047>
88. Kummitha RKR. Smart technologies for fighting pandemics: The techno- and human- driven approaches in controlling the virus transmission [published online ahead of print, 2020 Apr 20]. *Gov Inf Q*. 2020;101481. PMID: 32313361. <https://doi.org/10.1016/j.giq.2020.101481>
89. Abbas A, Abdelsamea M, Gaber M. Classification of COVID-19 in chest X-ray images using DeTraC deep convolutional neural network. medRxiv 2020.03.30.20047456; <https://doi.org/10.1101/2020.03.30.20047456>
90. Ardabili SF, Mosavi A, Ghamisi P, et al. COVID-19 Outbreak Prediction with Machine Learning. medRxiv 2020.04.17.20070094; <https://doi.org/10.1101/2020.04.17.20070094>
91. Zhang H, Dimitrov D, Simpson L, et al. A Web-based, Mobile Responsive Application to Screen Healthcare Workers for COVID Symptoms: Descriptive Study medRxiv 2020.04.17.20069211; <https://doi.org/10.1101/2020.04.17.20069211>
92. Hart JL, Turnbull AE, Oppenheim IM, Courtright KR. Family-Centered Care During the COVID-19 Era [published online ahead of print, 2020 Apr 22]. *J Pain Symptom Manage*. 2020;S0885-3924(20)30208-6. PMID: 32333961. <https://doi.org/10.1016/j.jpainsymman.2020.04.017>
93. Parikh A, Kumar AA, Jahangir E. Cardio-oncology Care in the Time of COVID-19 and the Role of Telehealth [published online ahead of print, 2020 Apr 22]. *JACC CardioOncol*. 2020;10.1016/j.jacc.2020.04.003. PMID: 32328590. <https://doi.org/10.1016/j.jacc.2020.04.003>
94. Rahman MS, Peeri NC, Shrestha N, et al. Defending against the Novel Coronavirus (COVID-19) Outbreak: How Can the Internet of Things (IoT) help to save the World? [published online ahead of print, 2020 Apr 22]. *Health Policy Technol*. 2020;10.1016/j.hlpt.2020.04.005. PMID: 32322475. <https://doi.org/10.1016/j.hlpt.2020.04.005>
95. Alwashmi MF. The Use of Digital Health in the Detection and Management of COVID-19. *Int J Environ Res Public Health*. 2020;17(8):E2906. Published 2020 Apr 23. PMID: 32340107. <https://doi.org/10.3390/ijerph17082906>
96. Sedov L, Krasnochub A, Polishchuk V. Modeling quarantine during epidemics and mass-testing using drones medRxiv 2020.04.15.20067025; <https://doi.org/10.1101/2020.04.15.20067025>
97. Mahapatra S, Nath P, Chatterjee M, et al. Repurposing Therapeutics for COVID-19: Rapid Prediction of Commercially available drugs through Machine Learning and Docking. medRxiv 2020.04.05.20054254; <https://doi.org/10.1101/2020.04.05.20054254>
98. Azizy A, Fayaz M, Agirbasli M. Do Not Forget Afghanistan in Times of COVID-19: Telemedicine and the Internet of Things to Strengthen Planetary Health Systems [published online ahead of print, 2020 Apr 23]. *OMICS*. 2020;10.1089/omi.2020.0053. PMID: 32324451. <https://doi.org/10.1089/omi.2020.0053>
99. Madurai Elavarasan R, Pugazhendhi R. Restructured society and environment: A review on potential technological strategies to control the COVID-19 pandemic [published online ahead of print, 2020 Apr 23]. *Sci Total Environ*. 2020;138858. PMID: 32336562. <https://doi.org/10.1016/j.scitotenv.2020.138858>

100. Park S, Choi GJ, Ko H. Information Technology-Based Tracing Strategy in Response to COVID-19 in South Korea-Privacy Controversies [published online ahead of print, 2020 Apr 23]. *JAMA*. 2020;10.1001/jama.2020.6602. PMID: 32324202. <https://doi.org/10.1001/jama.2020.6602>
101. Negrini S, Kiekens C, Bernetti A, et al. Telemedicine from research to practice during the pandemic. "Instant paper from the field" on rehabilitation answers to the Covid-19 emergency [published online ahead of print, 2020 Apr 24]. *Eur J Phys Rehabil Med*. 2020;10.23736/S1973-9087.20.06331-5. PMID: 32329593. <https://doi.org/10.23736/S1973-9087.20.06331-5>
102. Tanaka MJ, Oh LS, Martin SD, Berkson EM. Telemedicine in the Era of COVID-19: The Virtual Orthopaedic Examination [published online ahead of print, 2020 Apr 24]. *J Bone Joint Surg Am*. 2020;10.2106/JBJS.20.00609. PMID: 32341311. <https://doi.org/10.2106/JBJS.20.00609>
103. Randhawa GS, Soltysiak MPM, El Roz H, de Souza CPE, Hill KA, Kari L. Machine learning using intrinsic genomic signatures for rapid classification of novel pathogens: COVID-19 case study. *PLoS One*. 2020;15(4):e0232391. Published 2020 Apr 24. PMID: 32330208. <https://doi.org/10.1371/journal.pone.0232391>
104. Javaid M, Haleem A, Vaishya R, Bahl S, Suman R, Vaish A. Industry 4.0 technologies and their applications in fighting COVID-19 pandemic [published online ahead of print, 2020 Apr 24]. *Diabetes Metab Syndr*. 2020;14(4):419-422. PMID: 32344370. <https://doi.org/10.1016/j.dsx.2020.04.032>
105. Kyhlstedt M, Andersson SW. Diagnostic and digital solutions to address the COVID-19 pandemic: The need for international collaboration to close the gap [published online ahead of print, 2020 Apr 25]. *Health Policy Technol*. 2020;10.1016/j.hlpt.2020.04.010. PMID: 32341908. <https://doi.org/10.1016/j.hlpt.2020.04.010>
106. Barbosa RM, Fernandes MAC. Chaos game representation dataset of SARS-CoV-2 genome [published online ahead of print, 2020 Apr 25]. *Data Brief*. 2020;105618. PMID: 32341946. <https://doi.org/10.1016/j.dib.2020.105618>
107. Blake H, Bermingham F, Johnson G, Tabner A. Mitigating the Psychological Impact of COVID-19 on Healthcare Workers: A Digital Learning Package. *Int J Environ Res Public Health*. 2020;17(9):E2997. Published 2020 Apr 26. PMID: 32357424. <https://doi.org/10.3390/ijerph17092997>
108. Reeves JJ, Hollandsworth HM, Torriani FJ, et al. Rapid Response to COVID-19: Health Informatics Support for Outbreak Management in an Academic Health System [published online ahead of print, 2020 Mar 24]. *J Am Med Inform Assoc*. 2020;ocaa037. PMID: 32208481. <https://doi.org/10.1093/jamia/ocaa037>
109. Khan F, Ghaffar A, Khan N, Cho SH. An Overview of Signal Processing Techniques for Remote Health Monitoring Using Impulse Radio UWB Transceiver. *Sensors (Basel)*. 2020;20(9):E2479. Published 2020 Apr 27. PMID: 32349382. <https://doi.org/10.3390/s20092479>
110. Whelan P, Stockton-Powdrell C, Jardine J, Sainsbury J. Comment on "Digital Mental Health and COVID-19: Using Technology Today to Accelerate the Curve on Access and Quality Tomorrow": A UK Perspective. *JMIR Ment Health*. 2020;7(4):e19547. Published 2020 Apr 27. PMID: 32330113. <https://doi.org/10.2196/19547>
111. Meinert E, Milne-Ives M, Surodina S, Lam C. Agile Requirements Engineering and Software Planning for a Digital Health Platform to Engage the Effects of Isolation Caused by Social Distancing: Case Study. *JMIR Public Health Surveill*. 2020;6(2):e19297. Published 2020 May 6. PMID: 32348293. <https://doi.org/10.2196/19297>
112. Ekong I, Chukwu E, Chukwu M. COVID-19 Mobile Positioning Data Contact Tracing and Patient Privacy Regulations: Exploratory Search of Global Response Strategies and the Use of Digital Tools in Nigeria. *JMIR Mhealth Uhealth*. 2020;8(4):e19139. Published 2020 Apr 27. PMID: 32310817. <https://doi.org/10.2196/19139>
113. Pérez Sust P, Solans O, Fajardo JC, et al. Turning the Crisis Into an Opportunity: Digital Health Strategies Deployed During the COVID-19 Outbreak. *JMIR Public Health Surveill*. 2020;6(2):e19106. Published 2020 May 4. PMID: 32339998. <https://doi.org/10.2196/19106>
114. Kim H, Paul A. Contact Tracing: a game of big numbers in the time of COVID-19. medRxiv 2020.04.22.20071043; <https://doi.org/10.1101/2020.04.22.20071043>
115. Krukowski RA, Ross KM. Measuring weight with e-scales in clinical and research settings during the COVID-19 pandemic [published online ahead of print, 2020 Apr 27]. *Obesity (Silver Spring)*. 2020;10.1002/oby.22851. PMID: 32339394. <https://doi.org/10.1002/oby.22851>
116. Liu Q, Zheng Z, Zheng J, et al. Health Communication Through News Media During the Early Stage of the COVID-19 Outbreak in China: Digital Topic Modeling Approach. *J Med Internet Res*. 2020;22(4):e19118. Published 2020 Apr 28. PMID: 32302966. <https://doi.org/10.2196/19118>
117. Vaid A, Somani S, Russak AJ, et al. Machine Learning to Predict Mortality and Critical Events in COVID-19 Positive New York City Patients. medRxiv 2020.04.26.20073411; <https://doi.org/10.1101/2020.04.26.20073411>
118. Lee A. COVID-19 and the Advancement of Digital Physical Therapist Practice and Telehealth [published online ahead of print, 2020 Apr 28]. *Phys Ther*. 2020;pzaa079. PMID: 32343836. <https://doi.org/10.1093/ptj/pzaa079>

119. Tarek M, Elhefnawi M, Maricato JT, et al. Custommune: a web tool to design personalized and population-targeted vaccine epitopes. medRxiv 2020.04.25.20079426; <https://doi.org/10.1101/2020.04.25.20079426>
120. Awasthi R, Pal R, Singh P, et al. CovidNLP: A Web Application for Distilling Systemic Implications of COVID-19 Pandemic with Natural Language Processing. medRxiv 2020.04.25.20079129; <https://doi.org/10.1101/2020.04.25.20079129>
121. Khan HR, Hossain A. Countries are Clustered but Number of Tests is not Vital to Predict Global COVID-19 Confirmed Cases: A Machine Learning Approach. medRxiv 2020.04.24.20078238; <https://doi.org/10.1101/2020.04.24.20078238>
122. Husnayain A, Shim E, Fuad A, Su EC. Assessing the community risk perception toward COVID-19 outbreak in South Korea: evidence from Google and NAVER relative search volume. medRxiv 2020.04.23.20077552; <https://doi.org/10.1101/2020.04.23.20077552>
123. Weemaes M, Martens S, Cuypers L, et al. Laboratory information system requirements to manage the COVID-19 pandemic: a report from the Belgian national reference testing center [published online ahead of print, 2020 Apr 29]. J Am Med Inform Assoc. 2020;ocaa081. PMID: 32348469. PMID: 32325425. <https://doi.org/10.1093/jamia/ocaa081>
124. Espinoza J, Crown K, Kulkarni O. A Guide to Chatbots for COVID-19 Screening at Pediatric Health Care Facilities. JMIR Public Health Surveill. 2020;6(2):e18808. Published 2020 Apr 30. PMID: 32325425. <https://doi.org/10.2196/18808>
125. Shweta FNU, Murugadoss K, Awasthi S, et al. Augmented Curation of Unstructured Clinical Notes from a Massive EHR System Reveals Specific Phenotypic Signature of Impending COVID-19 Diagnosis. medRxiv 2020.04.19.20067660; <https://doi.org/10.1101/2020.04.19.20067660>
126. Brat GA, Weber GM, Gehlenborg N, et al. International Electronic Health Record-Derived COVID-19 Clinical Course Profiles: The 4CE Consortium. medRxiv 2020.04.13.20059691; <https://doi.org/10.1101/2020.04.13.20059691>
127. Hegde C, Jiang Z, Suresha PB, et al. AutoTriage - An Open Source Edge Computing Raspberry Pi-based Clinical Screening System. medRxiv 2020.04.09.20059840; <https://doi.org/10.1101/2020.04.09.20059840>
128. Tobias A, Valls J, Satorra P, Tebe C. COVID19-Tracker: A shiny app to produce comprehensive data visualization for SARS-CoV-2 epidemic in Spain medRxiv 2020.04.01.20049684; <https://doi.org/10.1101/2020.04.01.20049684>
129. Compton M, Soper M, Reilly B, et al. A Feasibility Study of Urgent Implementation of Cystic Fibrosis Multidisciplinary Telemedicine Clinic in the Face of COVID-19 Pandemic: Single-Center Experience [published online ahead of print, 2020 Apr 30]. Telemed J E Health. 2020;10.1089/tmj.2020.0091. PMID: 32357084. <https://doi.org/10.1089/tmj.2020.0091>
130. Smith WR, Atala AJ, Terlecki RP, et al. Implementation Guide for Rapid Integration of an Outpatient Telemedicine Program during the COVID-19 Pandemic [published online ahead of print, 2020 Apr 30]. J Am Coll Surg. 2020;S1072-7515(20)30375-6. PMID: 32360960. <https://doi.org/10.1016/j.jamcollsurg.2020.04.030>
131. Kalteh EA, Rajabi A. COVID-19 and digital epidemiology [published online ahead of print, 2020 Apr 30]. Z Gesundh Wiss. 2020;1□3. PMID: 32355606. <https://doi.org/10.1007/s10389-020-01295-y>
132. Woo Baidal JA, Chang J, Hulse E, et al. Zooming Towards a Telehealth Solution for Vulnerable Children with Obesity During COVID-19 [published online ahead of print, 2020 Apr 30]. Obesity (Silver Spring). 2020;10.1002/oby.22860. PMID: 32352650. <https://doi.org/10.1002/oby.22860>
133. Ciaffi J, Meliconi R, Landini M, Ursini F. Google Trends and COVID-19 in Italy. Could we brace for impact? (Preprint). 2020. <https://doi.org/10.2196/preprints.19426>
134. Carullo G. Digitalization of controls at the time of coronavirus. CERIDAP. 2020;1:7. <https://ceridap.eu/digitalizzazione-dei-controlli-ai-tempi-del-coronavirus/>
135. Doran CM, Kinchin I. Economics of Mental Health: Providing a Platform for Efficient Mental Health Policy. Appl Health Econ Health Policy. 2020;18:143–145. PMID: 32173795. <https://doi.org/10.1007/s40258-020-00569-6>.
